# Supplementary material for: Auditory interfaces in automated driving: an international survey
Source: PeerJ journal article supplement (doi:10.7717/peerj-cs.13), 2015-08-19
Supplement: Supplementary_material.zip [file Supplementary_material.zip]

## Sheet: Sheet1
Spearman correlation matrix among survey variables
	Gender	Age	DriveFreq	KmYear	NrAcc	Vangered	Vmotorway	Vresident	Vfollowing	Vrace	Vhorn	Vphone	Vmean	PApast	PAhelp	PAannoy	PAfut	FCWSpast	FCWShelp	FCWSannoy	FCWSfut	FSannoy	FSfut	FACpref	YearAuto	SurvTime
Gender
Age	-0.154374
DriveFreq	0.061307	0.232844
KmYear	0.01909	0.228929	0.469388
NrAcc	0.0529667	-0.041376	0.0894625	0.10484
Vangered	0.109326	-0.0229962	0.119561	0.122936	0.174418
Vmotorway	0.108104	0.0150472	0.127952	0.164109	0.129903	0.306435
Vresident	0.0805547	-0.0147263	0.102161	0.0922489	0.128795	0.266856	0.532588
Vfollowing	0.151898	-0.100002	0.108089	0.0342081	0.217158	0.248079	0.251615	0.276276
Vrace	0.0943898	-0.167023	0.0628682	0.0558375	0.148515	0.225689	0.27565	0.314884	0.348882
Vhorn	0.0809754	-0.102212	0.0829725	0.0714892	0.251036	0.312671	0.213328	0.139793	0.305506	0.242952
Vphone	0.0604523	-0.0691169	0.0866339	0.0896962	0.162628	0.179826	0.257059	0.266925	0.330827	0.244785	0.258092
Vmean	0.159596	-0.0868854	0.177548	0.150695	0.243698	0.581816	0.679067	0.64342	0.547547	0.499404	0.576723	0.559789
PApast	0.0315557	-0.0623522	0.0932745	0.103896	0.0701262	0.0814687	0.0954156	0.0542759	0.132633	0.120758	0.102858	0.0783537	0.126067
PAhelp	0.0191991	0.030718	-0.00733352	0.0263178	0.0223377	0.0314014	-0.048316	-0.0192137	-0.0523936	-0.0880556	0.0735032	-0.0563423	-0.0184726	0.112128
PAannoy	-0.0541985	-0.0470222	-0.0724064	-0.0162013	0.0111775	0.00120023	0.0411328	0.0299489	0.00792485	0.0502903	0.00961606	0.0452996	0.0377321	-0.138929	-0.457277
PAfut	-0.00547933	-0.0149286	-0.0542478	-0.056113	0.0441368	0.0273141	-0.0880829	-0.0216523	-0.00641275	-0.0330408	0.0763475	0.0105527	0.000717571	0.0335839	0.353588	-0.214161
FCWSpast	0.0544175	-0.117432	0.0639855	0.0607879	0.108804	0.0535166	-0.00655045	-0.00072305	0.173861	0.146035	0.0732981	0.0955451	0.0766765	0.304539	-0.0614221	0.034627	0.0402397
FCWShelp	0.0559582	0.123566	0.0588124	0.0183862	-0.0167495	-0.0129104	-0.137917	-0.0634572	-0.0537676	-0.0694016	-0.00778191	-0.040816	-0.0834419	-0.0312752	0.342854	-0.235612	0.332052	0.0408851
FCWSannoy	-0.0435811	-0.143823	-0.0596117	-0.0165082	0.0369668	-0.00723669	0.0596183	0.0382824	0.0246269	0.071012	0.038888	0.011044	0.0503349	0.0004115	-0.232779	0.465788	-0.201543	0.0260303	-0.489607
FCWSfut	0.0726293	0.00189776	0.0127166	-0.0077511	-0.00137872	0.0103009	-0.0930592	-0.0297567	-0.0386337	-0.0594152	0.0294166	0.0146111	-0.0266005	0.0115036	0.258347	-0.20555	0.388811	0.0233513	0.489685	-0.31624
FSannoy	-0.00550154	0.0605941	0.00538256	0.00740777	-0.0481794	-0.0369356	-0.0168066	-0.00566238	-0.0179976	0.00384799	-0.035587	-0.0244652	-0.0359465	0.0277491	-0.0539181	0.122572	-0.11267	0.0141956	-0.0411339	0.15236	-0.0585704
FSfut	0.0430068	-0.0428855	-0.0253114	-0.0630542	0.0675264	0.0514131	-0.0926447	-0.0125949	0.0553109	0.0488047	0.0852244	0.0390175	0.0345589	0.0117671	0.0874969	-0.018545	0.239488	0.0695438	0.142384	-0.0253693	0.202387	-0.176246
FACpref	0.00213406	-0.0354991	-0.05196	-0.0810936	0.074731	0.0344739	-0.130239	-0.080046	0.0232594	0.0419365	0.0391391	-0.028523	-0.0466418	0.0804314	0.190417	-0.0727635	0.44021	0.161402	0.237769	-0.122693	0.345925	-0.136165	0.332796
YearAuto	0.0319359	0.00237605	-0.0454309	-0.00114888	-0.0506161	-0.00791556	0.0349792	0.0288899	-0.0147643	-0.0748029	-0.0110232	0.0233375	0.0223691	-0.150237	-0.0178845	0.0258098	-0.0767933	-0.118441	-0.0541321	0.0303986	-0.0867612	-0.00450004	-0.106702	-0.182679
SurvTime	0.0598872	0.0668982	-0.0984922	-0.0772118	0.081099	-0.0428535	-0.0619772	-0.0780397	-0.0576602	-0.142266	0.0523628	0.0194869	-0.0153839	-0.00791897	0.157316	-0.0756537	0.0882166	-0.138094	0.114866	-0.0826253	0.111225	-0.0517704	0.0474835	0.0154246	0.0828243
Note. For the variables Papast and FCWSpast, the response option 'I don't know' was ignored when calculating the correlation coefficients.
